# Supplementary material for: Scalable generation of functional human iPSC-derived CAR-macrophages that efficiently eradicate CD19-positive leukemia
Source: HighWire-hosted journal article supplement (doi:10.1136/jitc-2023-007705), 2023-12-01
Supplement: jitc-2023-007705supp003_data_supplement.pdf [file jitc-2023-007705supp003_data_supplement.pdf]

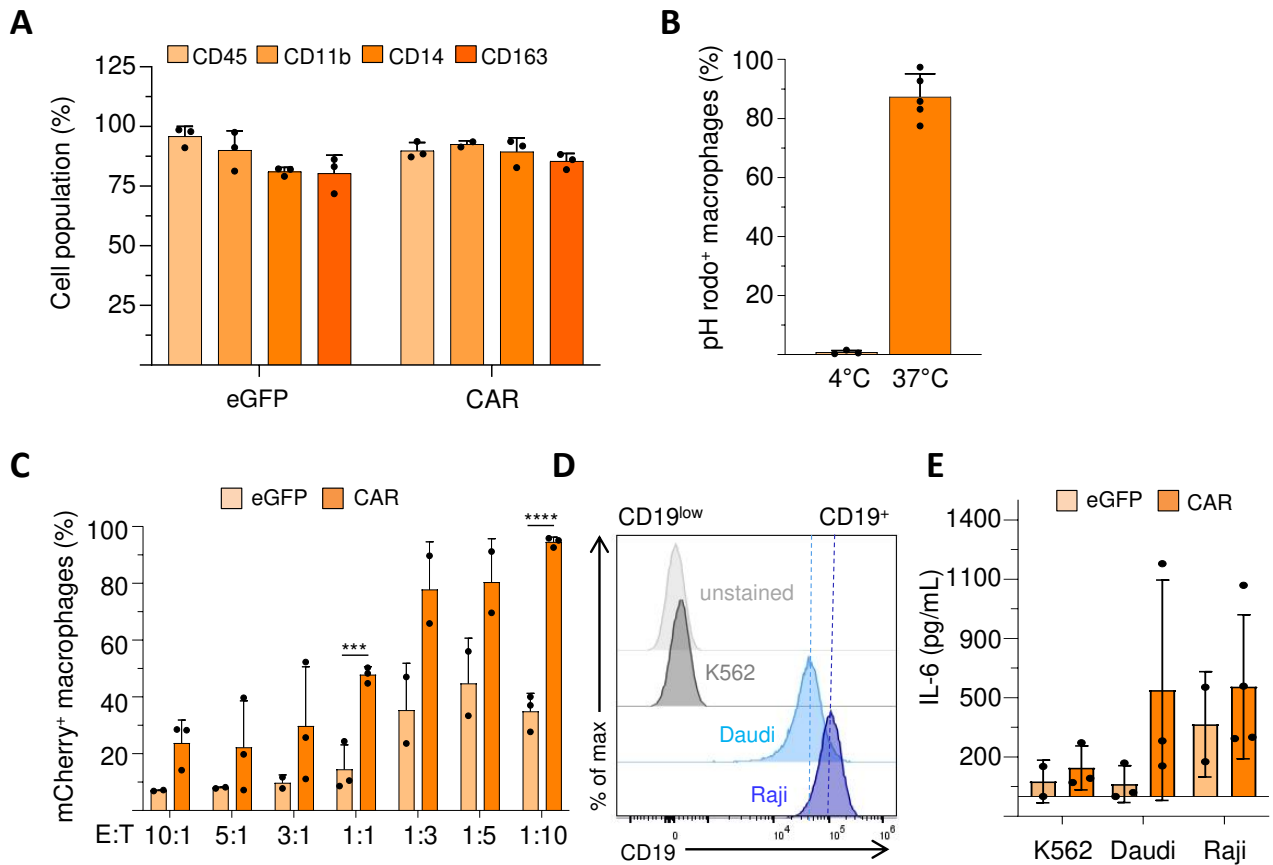

**Supplemental Figure 3.** Phenotypic and functional characterization of CAR-iMacs.

**(A)** Surface marker expression profile by flow cytometric analyses (n=2-3). **(B)** Basic phagocytic activity against *E. coli*-coupled particles as shown by flow cytometry (n=5). **(C)** Flow cytometric analyses of percentages (%) of mCherry-positive Raji cells inside the eGFP<sup>+</sup> macrophages (eGFP /CAR-iMacs) after co-culture with target cells at different effector to target ratios (E/T) for 4 h, statistical significance was calculated for E:T (ratios 1:1, and 1:10) with two-way ANOVA using multiple comparisons (n=2-3). **(D)** Additional representative plot of flow cytometric analyses of CD19 expression on leukemia target cells. **(E)** IL-6 secretion measured by ELISA after co-culture of CAR-iMacs or eGFP iMacs with CD19<sup>+</sup> cells (Raji, Daudi) or CD19<sup>low</sup> cells (K562) for 4 h. (n=3-4). All data are represented as the mean ± SD.
