# Supplementary material for: Scalable generation of functional human iPSC-derived CAR-macrophages that efficiently eradicate CD19-positive leukemia
Source: HighWire-hosted journal article supplement (doi:10.1136/jitc-2023-007705), 2023-12-01
Supplement: jitc-2023-007705supp004_data_supplement.pdf [file jitc-2023-007705supp004_data_supplement.pdf]

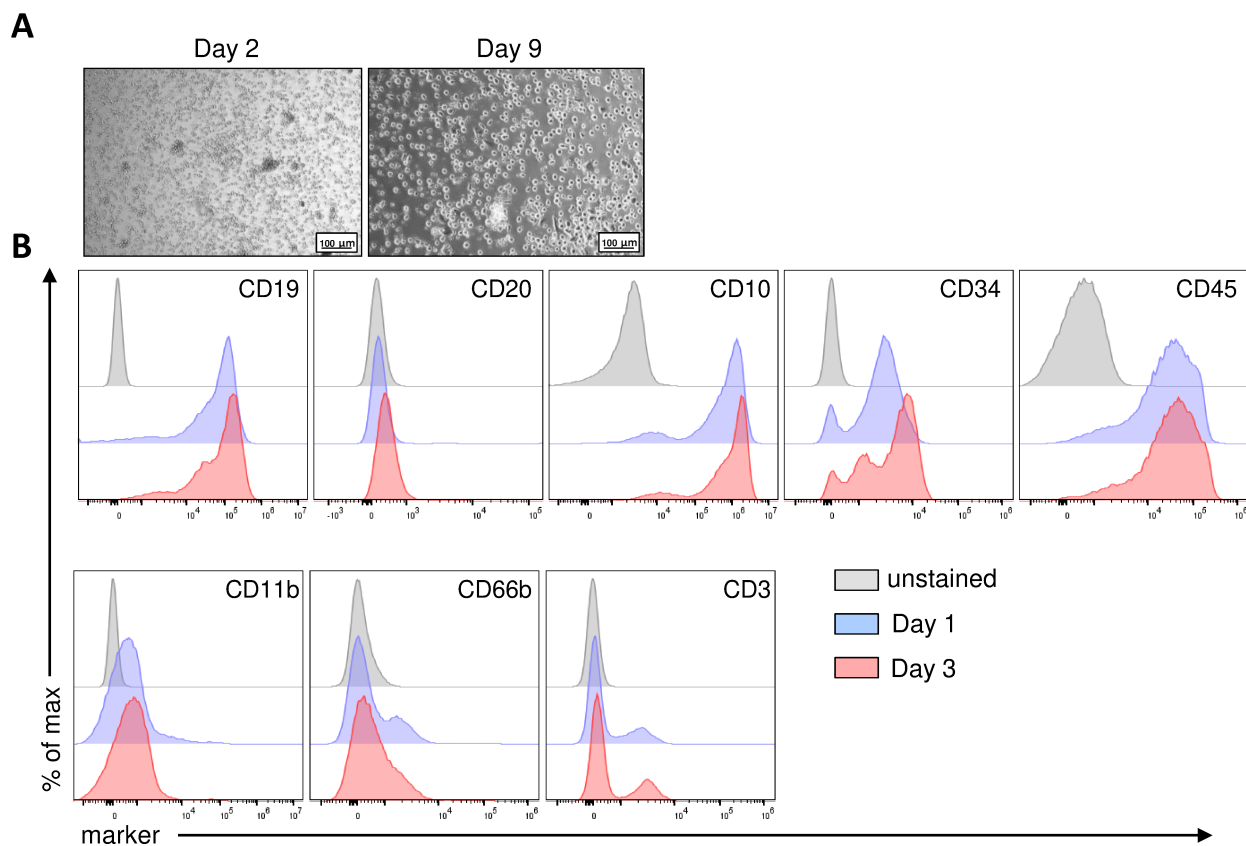

**Supplemental Figure 4.** Phenotypic characterization of ALL patient samples

**(A)** Brightfield microscopy images of representative thawed ALL patient samples. **(B)** Surface marker expression profile of ALL patient samples by flow cytometric analysis at different time points post-thawing (representative for n=3).
