# Supplementary material for: Scalable generation of functional human iPSC-derived CAR-macrophages that efficiently eradicate CD19-positive leukemia
Source: HighWire-hosted journal article supplement (doi:10.1136/jitc-2023-007705), 2023-12-01
Supplement: jitc-2023-007705supp005_data_supplement.pdf [file jitc-2023-007705supp005_data_supplement.pdf]

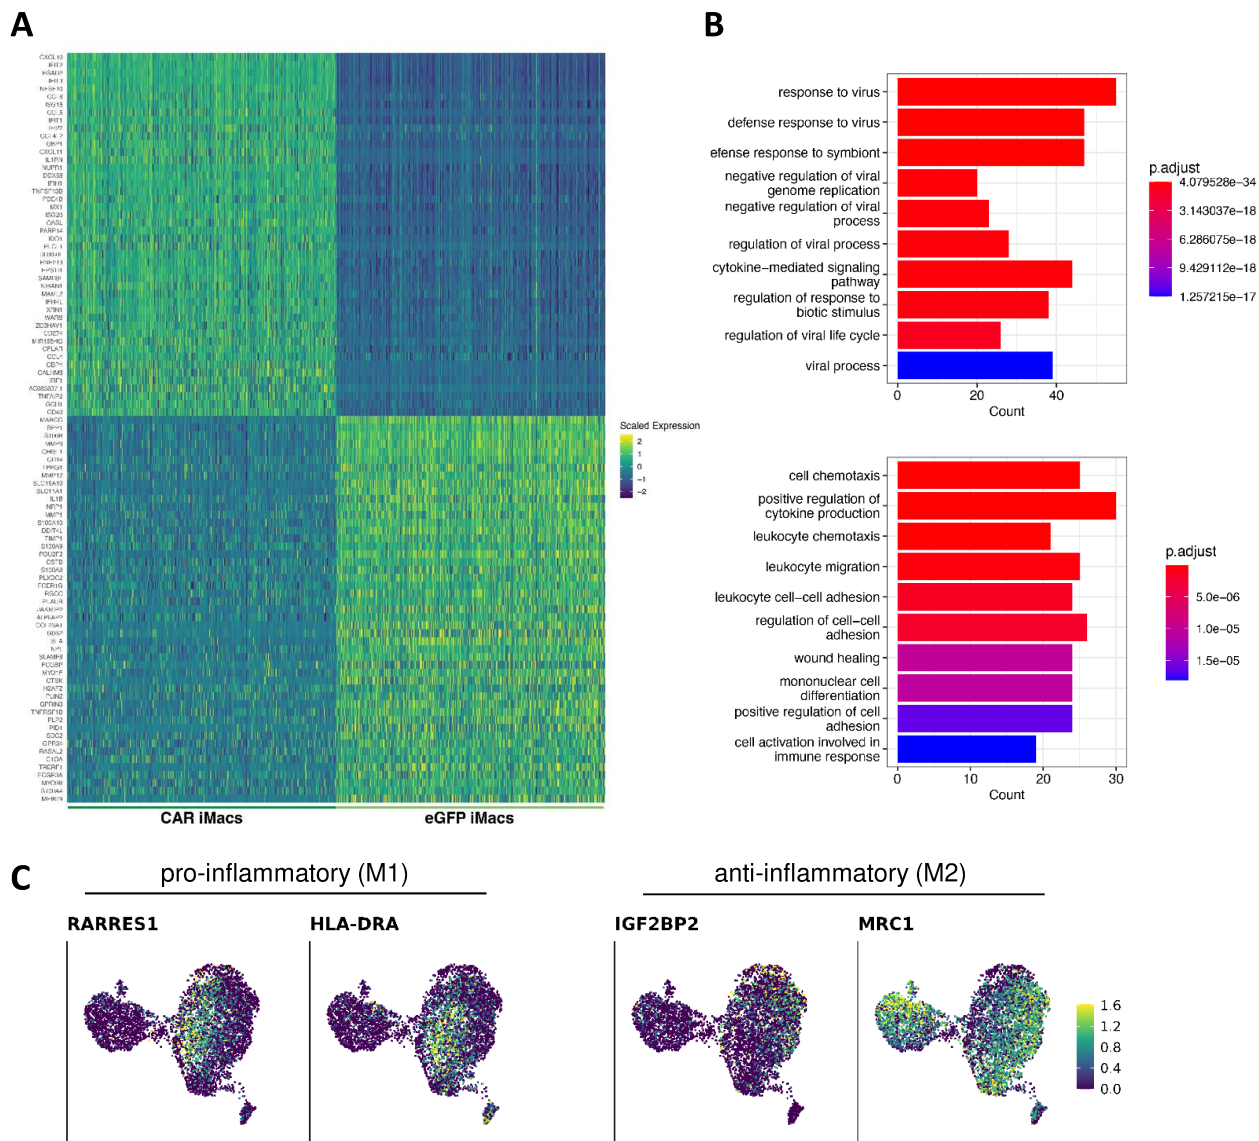

**Supplemental Figure 5.** CAR-iMacs show anti-viral immune response after co-culture with CD19<sup>+</sup> target cells. **(A)** Top 15 differentially-expressed genes of CAR-macrophage population after co-culture with Raji or ALL cells compared to eGFP macrophage population. **(B)** Top GO terms enriched in CAR and eGFP iMacs upon co-culture with CD19<sup>+</sup> Raji cells. **(C)** UMAP plots illustrating the phenotypic distinction of eGFP iMacs and CAR-iMacs after co-culture with CD19<sup>+</sup> Raji or ALL cells, colored according to gene expression.
